# Supplementary material for: Enhancement of gold-nanocluster-mediated chemotherapeutic efficiency of cisplatin in lung cancer
Source: Royal Society of Chemistry journal article supplement (doi:10.1039/d1tb00276g), 2021-01-01

## Supporting Information

### Enhancement of gold-nanocluster-mediated chemotherapeutic efficiency of cisplatin in lung cancer

Mei Jiang<sup>a,b,c,†</sup>, Yuchen Lin<sup>a,b,†</sup>, Xiaocui Fang<sup>a,b</sup>, Mingpeng Liu<sup>a,b</sup>, Lilusi Ma<sup>a,b</sup>, Jingyi Liu<sup>a,b</sup>, Mengting Chen<sup>a,b</sup>, Yanlian Yang<sup>a,b\*</sup>, Chen Wang<sup>a,b\*</sup>

<sup>a</sup> CAS Key Laboratory of Biological Effects of Nanomaterials and Nanosafety, CAS Key Laboratory of Standardization and Measurement for Nanotechnology, CAS Center for Excellence in Nanoscience, National Center for Nanoscience and Technology, Beijing 100190, P. R. China

<sup>b</sup> University of Chinese Academy of Sciences, Beijing 100049, P. R. China

<sup>c</sup> Central Laboratory, Beijing Obstetrics and Gynecology Hospital, Capital Medical University, Beijing 100026, P. R. China

<sup>†</sup> These authors contributed equally to this work.

\*Email: wangch@nanoctr.cn, yangyl@nanoctr.cn.

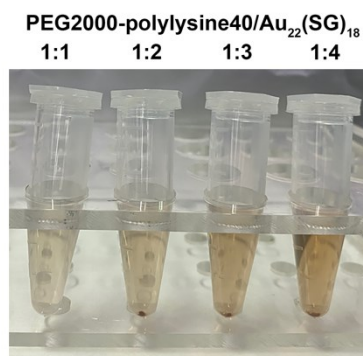

**Fig. S1.** Synthesis of GC-pKs. PEG2000-polylysine40 and Au<sub>22</sub>(SG)<sub>18</sub> were mixed with various molar ratios (1:1~1:4) under sonication for 10 min at room temperature. The mixture solution was then centrifuged at 12000 g for 30 min at room temperature, and the final solutions were photographed.

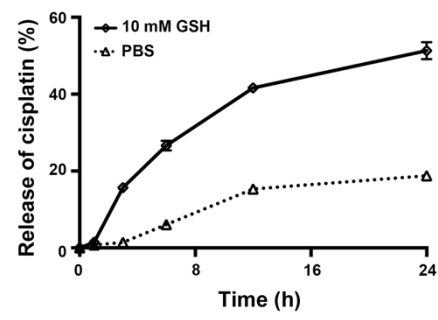

**Fig. S2.** Accumulative cisplatin release from the cisplatin@GC-pKs in PBS buffer and 10 mM GSH solution.

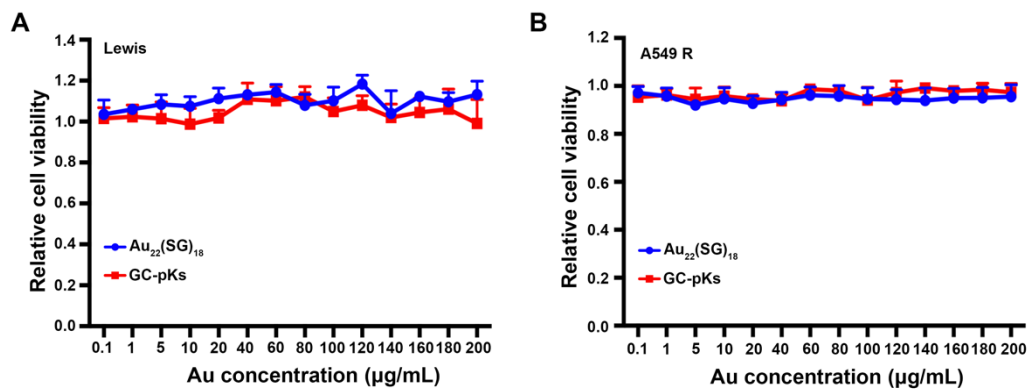

**Fig. S3.** *In vitro* cytotoxicity of  $Au_{22}(SG)_{18}$  and GC-pKs. Lewis cells (A) and A549R cells (B) were incubated with  $Au_{22}(SG)_{18}$  and GC-pKs containing different Au concentrations (0.1~200 µg/mL) for 24 h at 37 °C. Cell viability was evaluated by the MTS assay. The viabilities of cancer cells after treatment with PBS buffer were used as control. Error bars represent standard deviation ( $n = 3$ ).

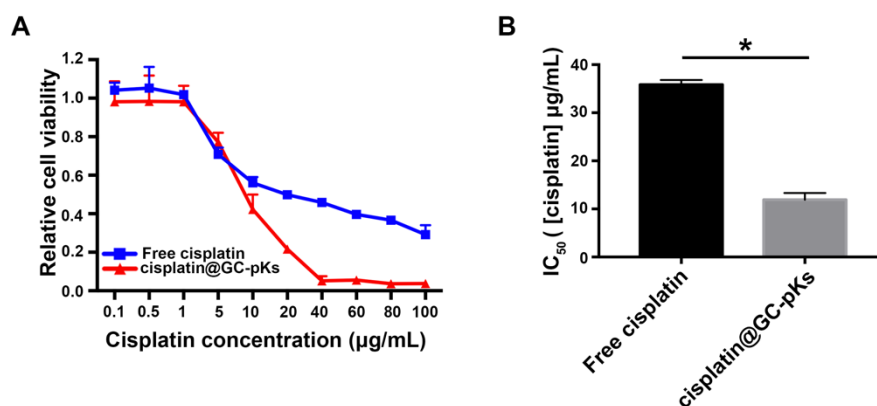

**Fig. S4.** Cytotoxicity of free cisplatin and cisplatin@GC-pKs in Lewis cells. (A) The relative cell viabilities of Lewis cells after incubation with different concentrations of cisplatin and cisplatin@GC-pKs for 24 hours were determined using an MTS assay; (B)  $\text{IC}_{50}$  values of cisplatin@GC-pKs and free cisplatin according to (A) were calculated using SPSS 12.0;

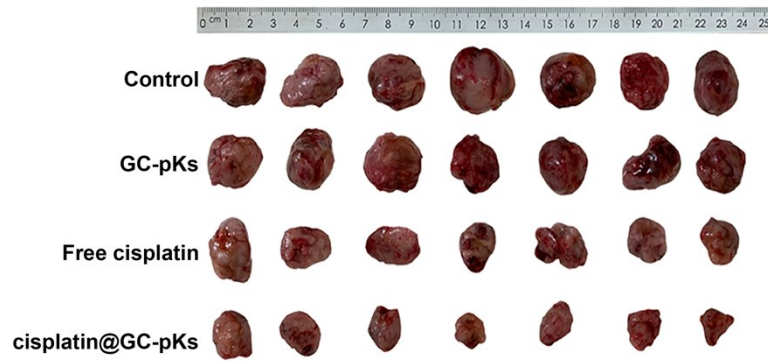

**Fig. S5.** Representative appearance of the tumors from the C57/BL6 mice after different treatments with saline ( $n=7$ ), GC-pKs ( $n=7$ ), free cisplatin ( $n=7$ ) and cisplatin@GC-pKs ( $n=7$ ) were photographed on the 21st day.

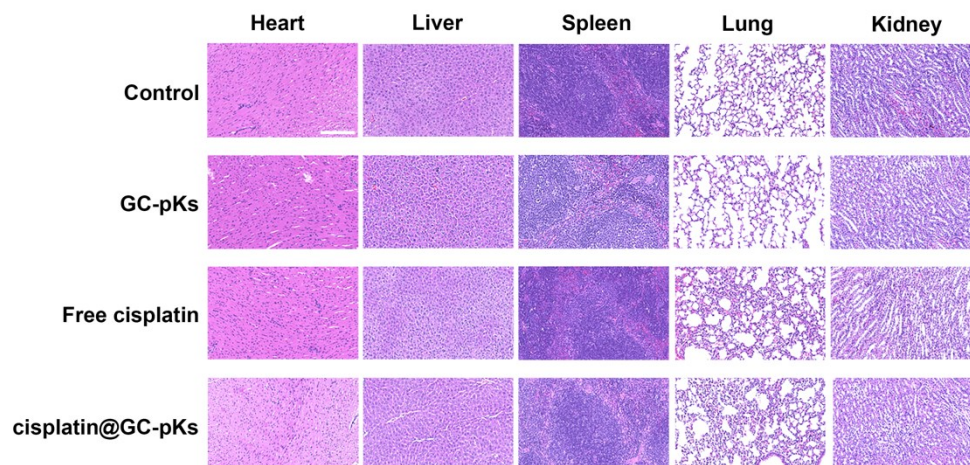

**Fig. S6.** Histopathological examination (H&E) of the major organs (heart, liver, spleen, lung and kidney) derived from the C57/BL6 mice after treatment with saline, GC-pKs, free cisplatin and cisplatin@GC-pKs, respectively. (Scale bar, 200  $\mu$ m).

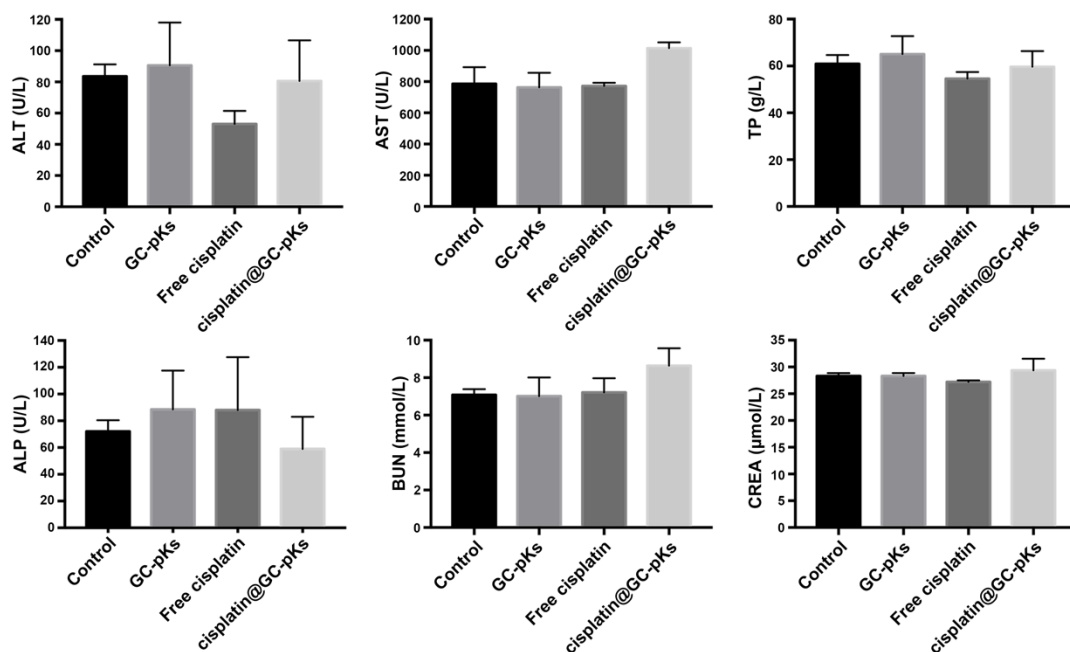

**Fig. S7.** Blood biochemistry analysis of the C57/BL6 mice after treatment with saline, GC-pKs, free cisplatin and cisplatin@GC-pKs on the 21st day after treatment. The results indicated the relative mean values of alanine aminotransferase (ALT), aspartate aminotransferase (AST), total protein (TP), alkaline phosphatase (ALP), blood urea nitrogen (BUN), and creatinine (CREA), respectively. Data are presented as the mean  $\pm$  SD ( $n = 3$ ).

## Original gels of Fig 4D

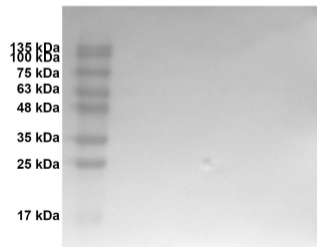

Caspase-8  
Cleaved caspase-8

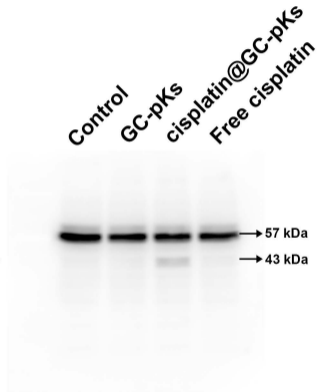

GAPDH

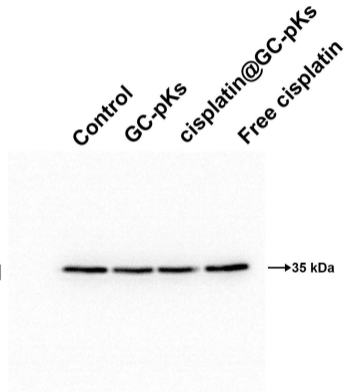

Supplement: d1tb00276g1.pdf [file d1tb00276g1.pdf]
